# Supplementary material for: Sialic acid blockade inhibits the metastatic spread of prostate cancer to bone
Source: PubMed Central journal article supplement (PMC11134892; doi:10.1016/j.ebiom.2024.105163), 2024-05-20

Supplementary Figure 1

**a**

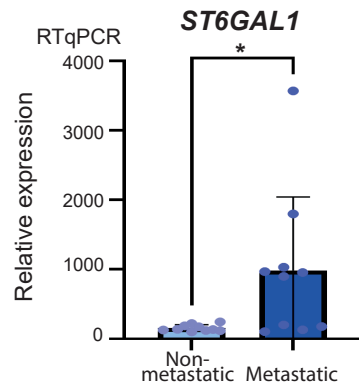

**b**

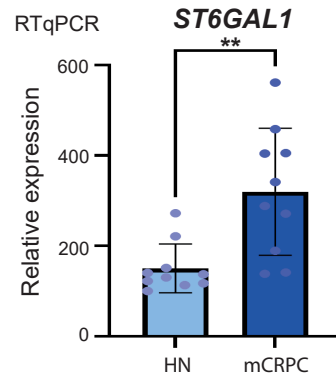

**c**

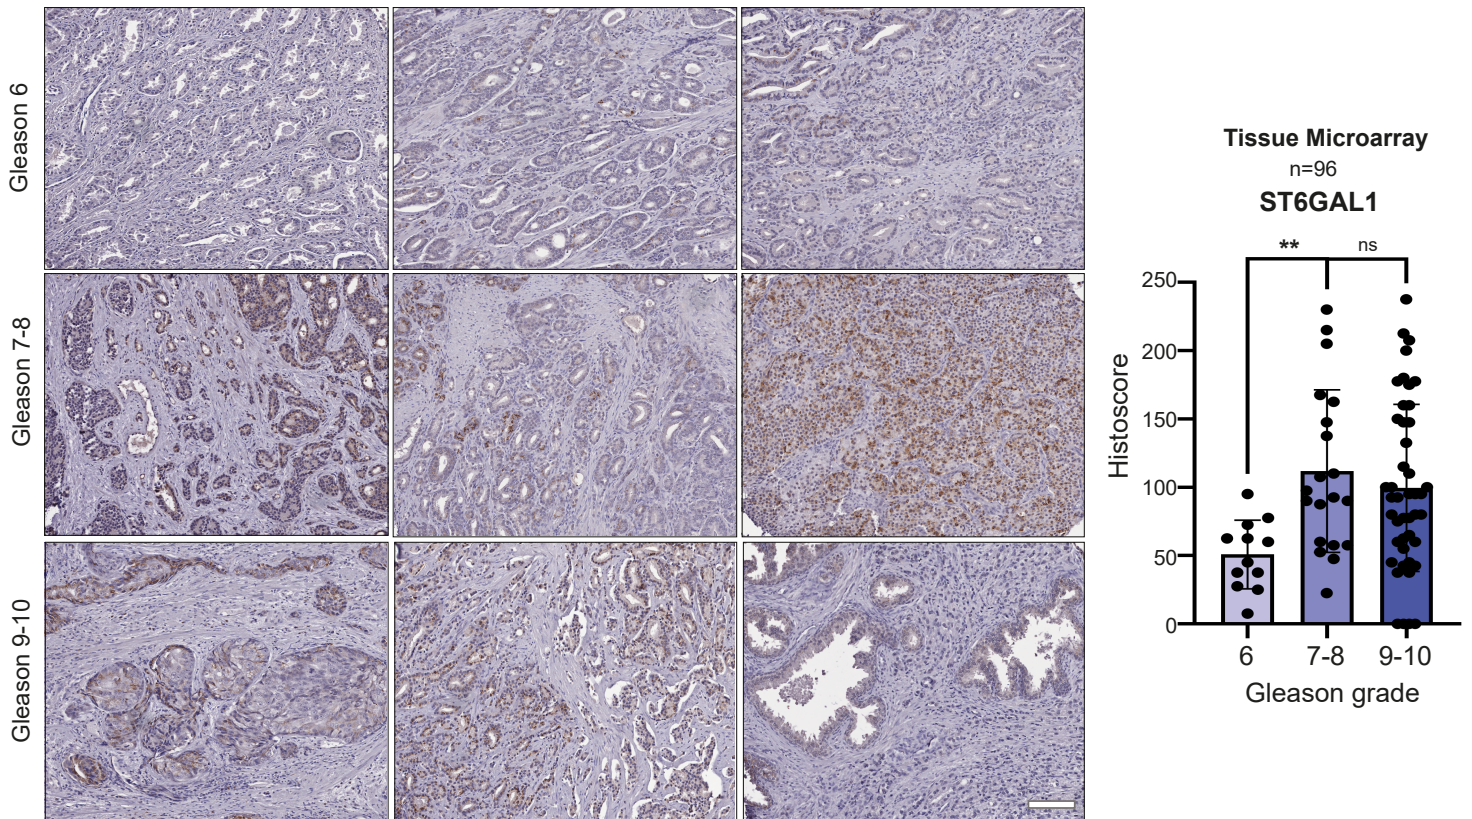

Supplementary Figure 2

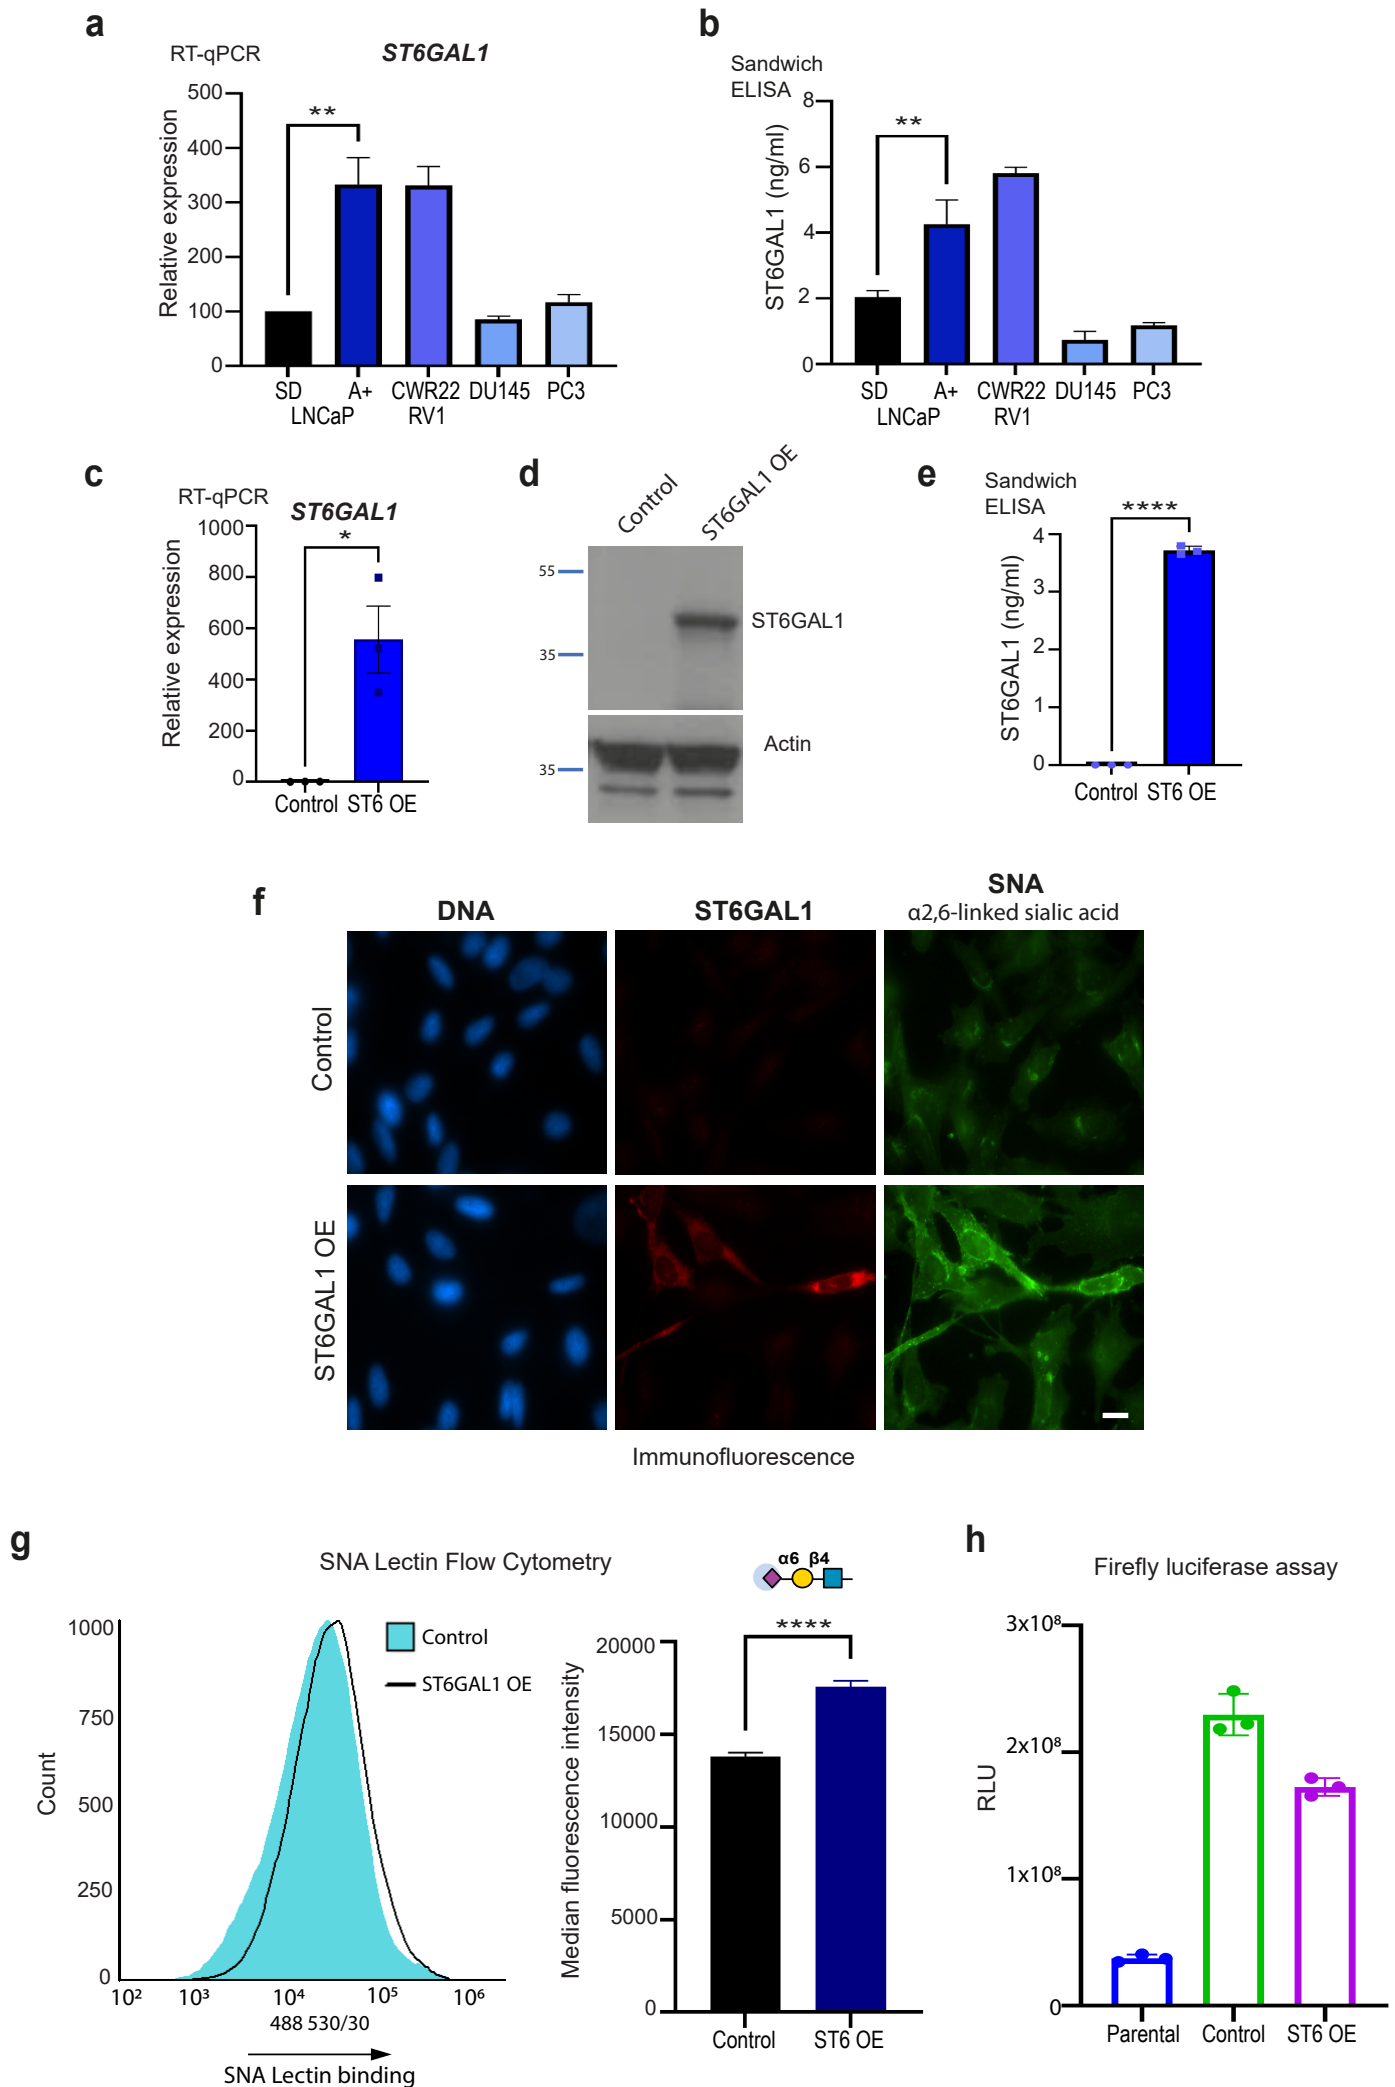

Supplementary Figure 3

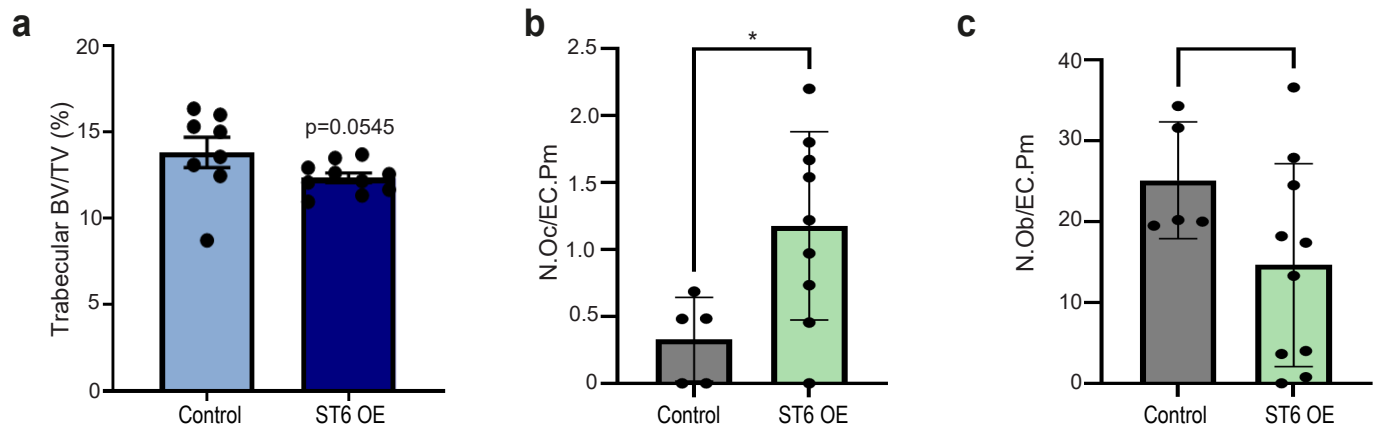

Supplementary Figure 4

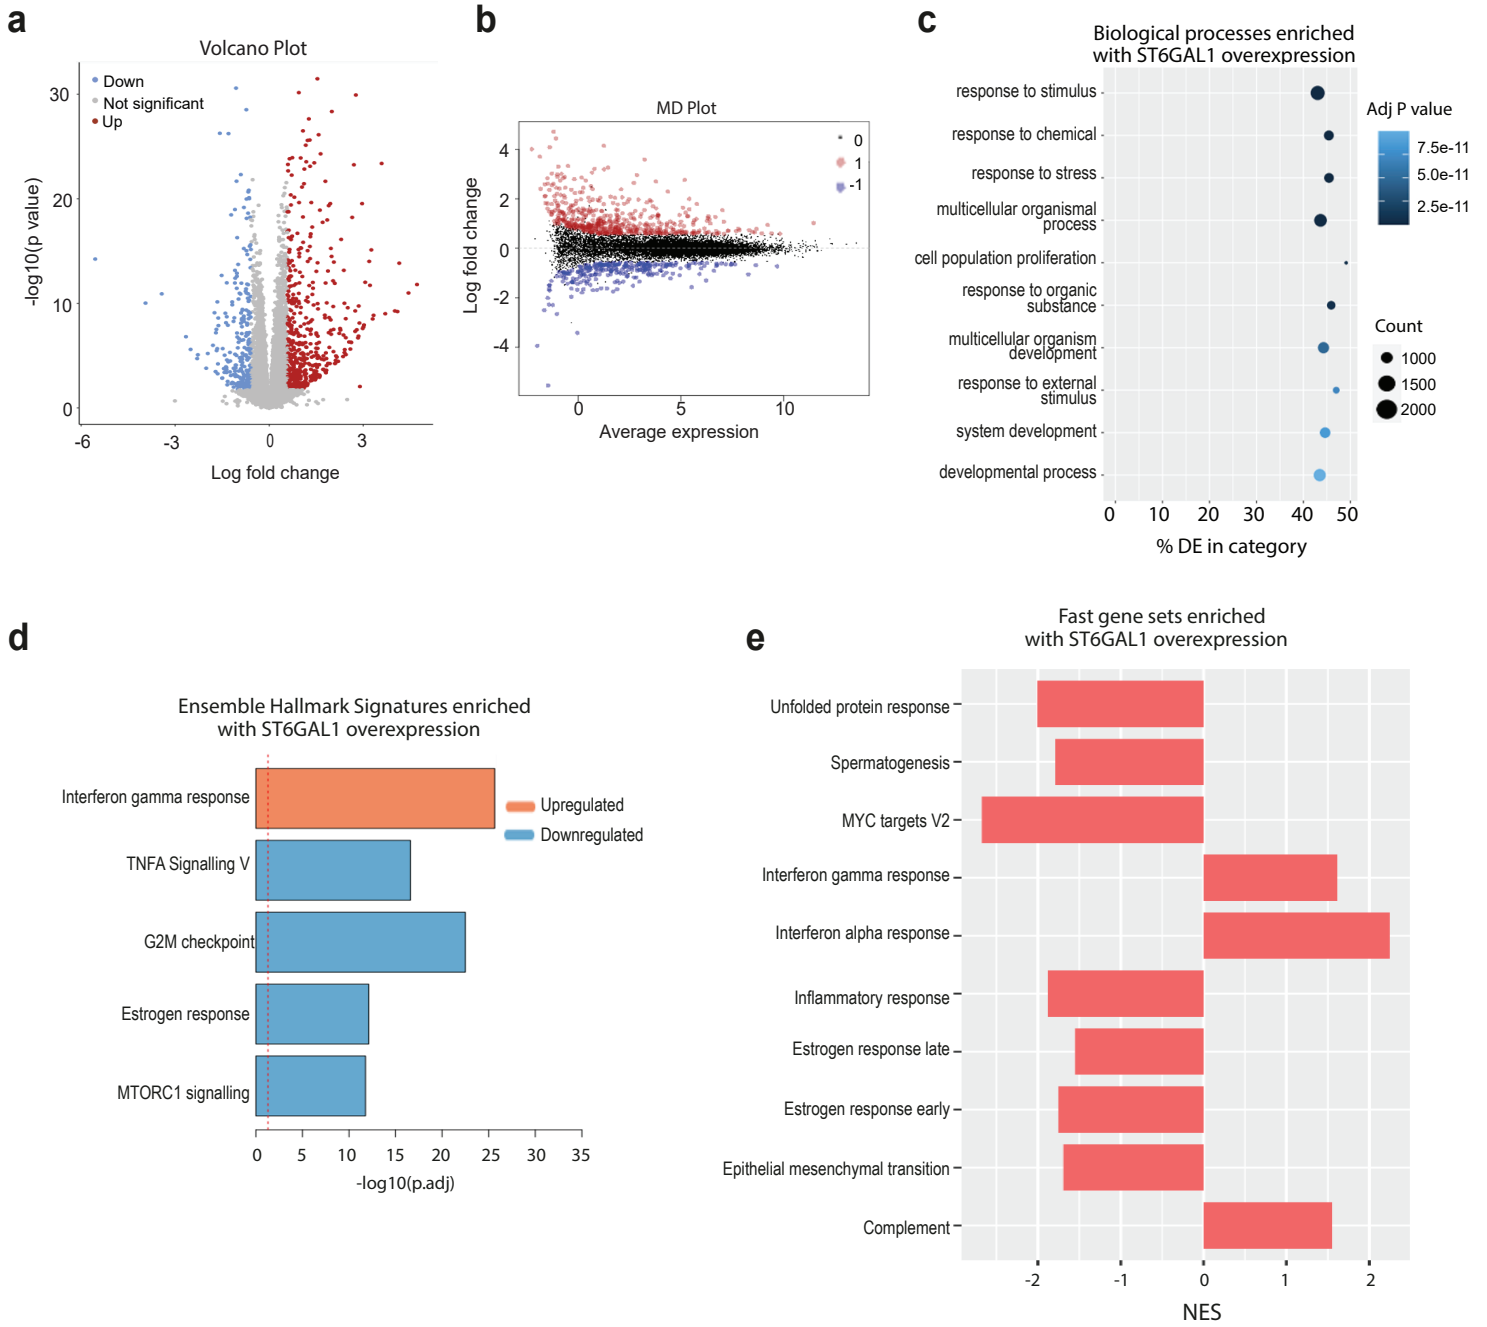

Supplementary Figure 5

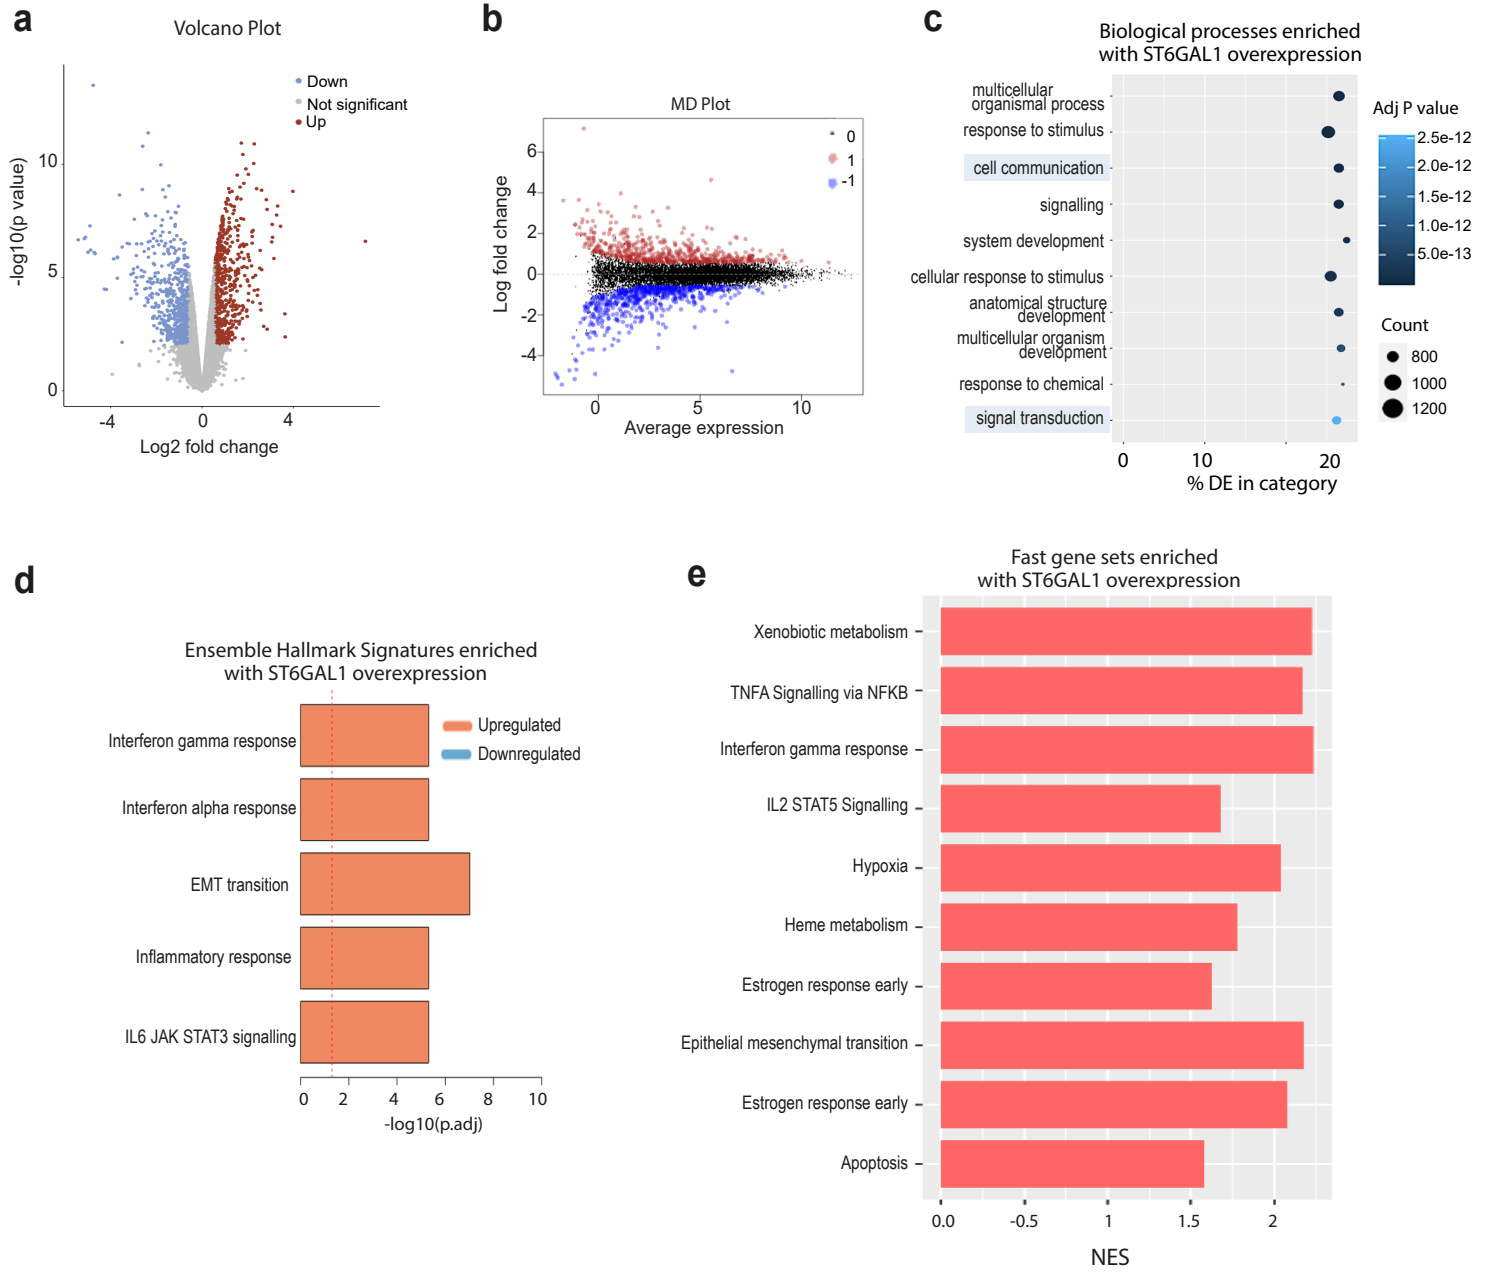

**a**

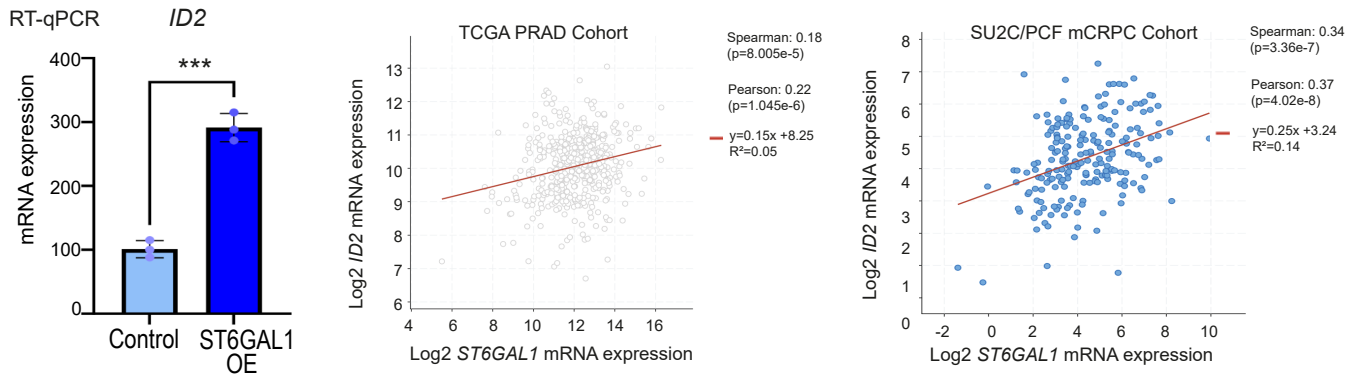

**b**

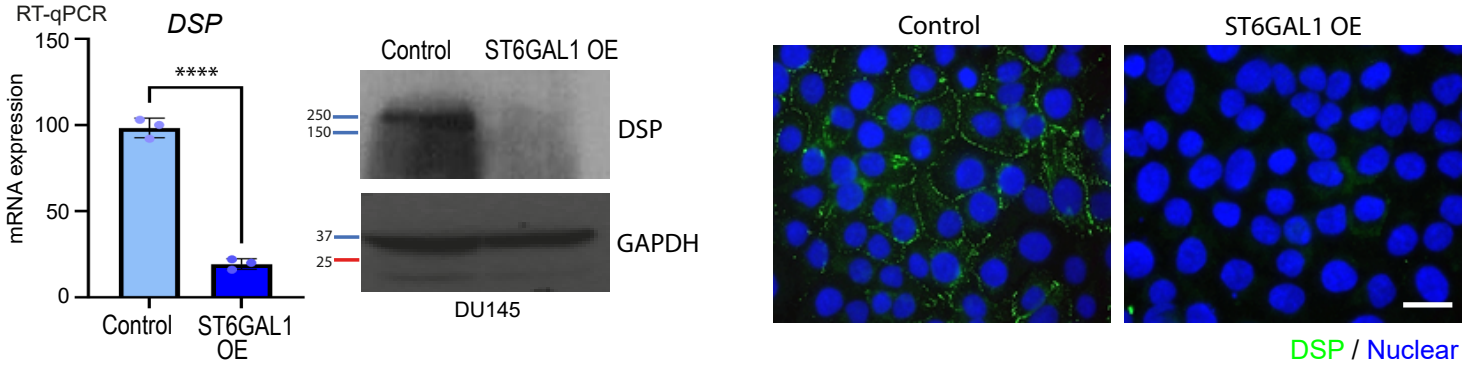

**c**

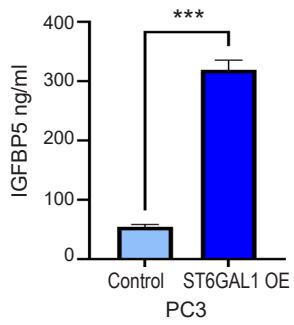

**d**

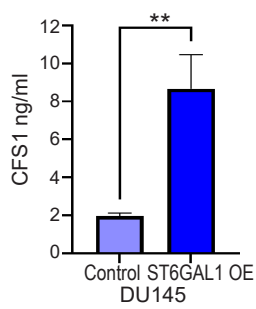

**e**

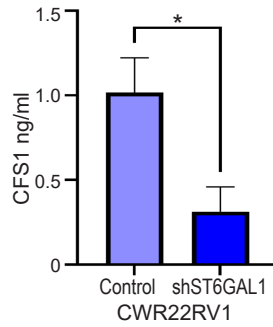

**f**

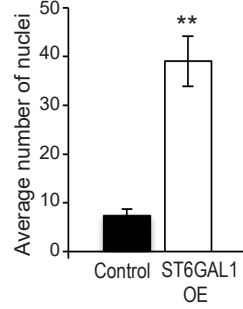

**g**

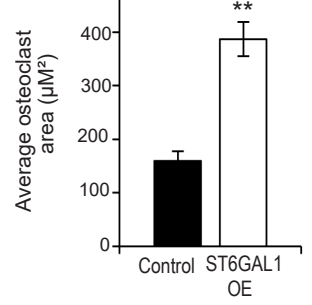

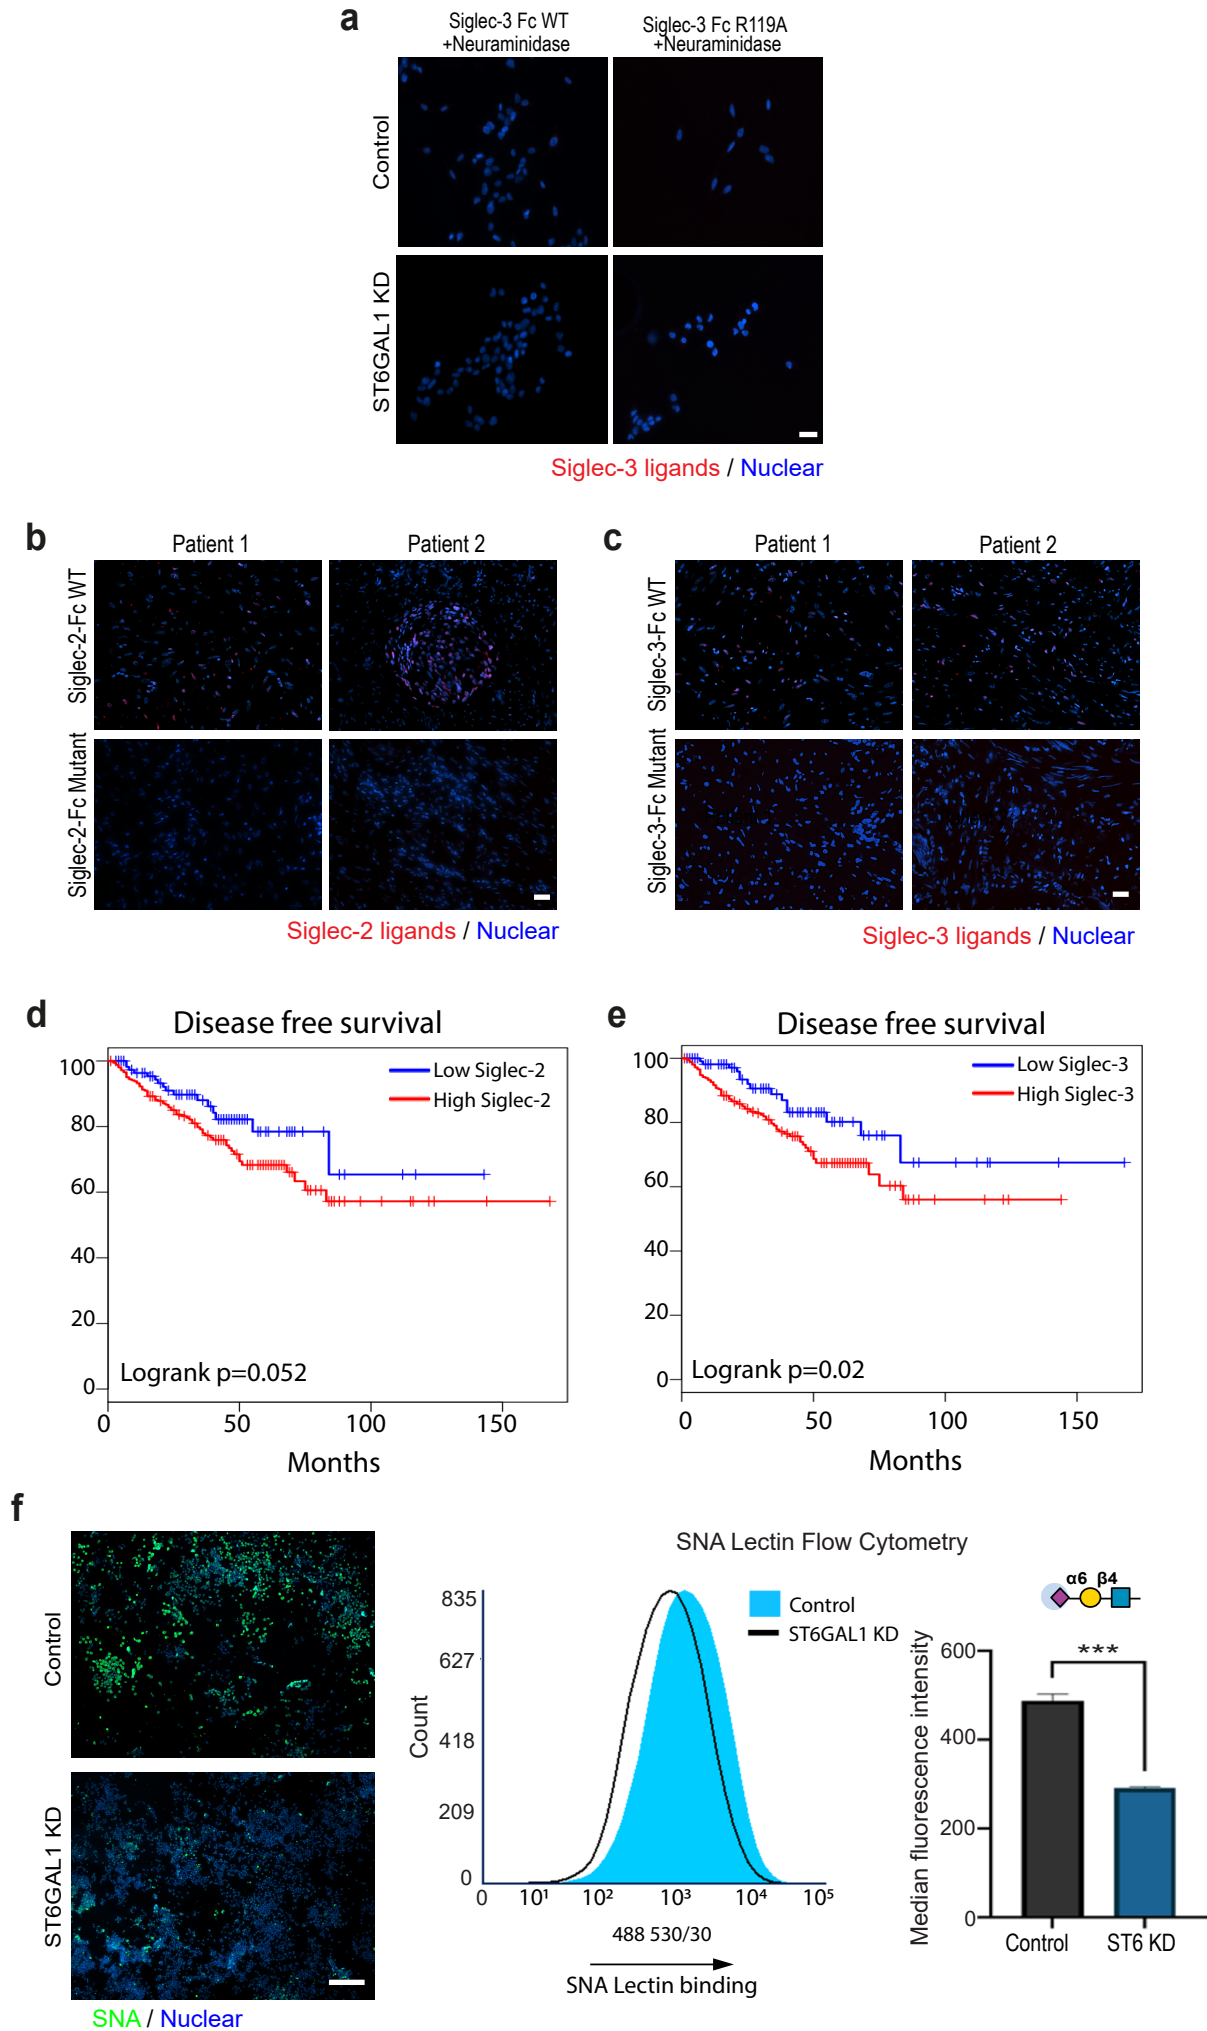

# Supplementary Figure 8

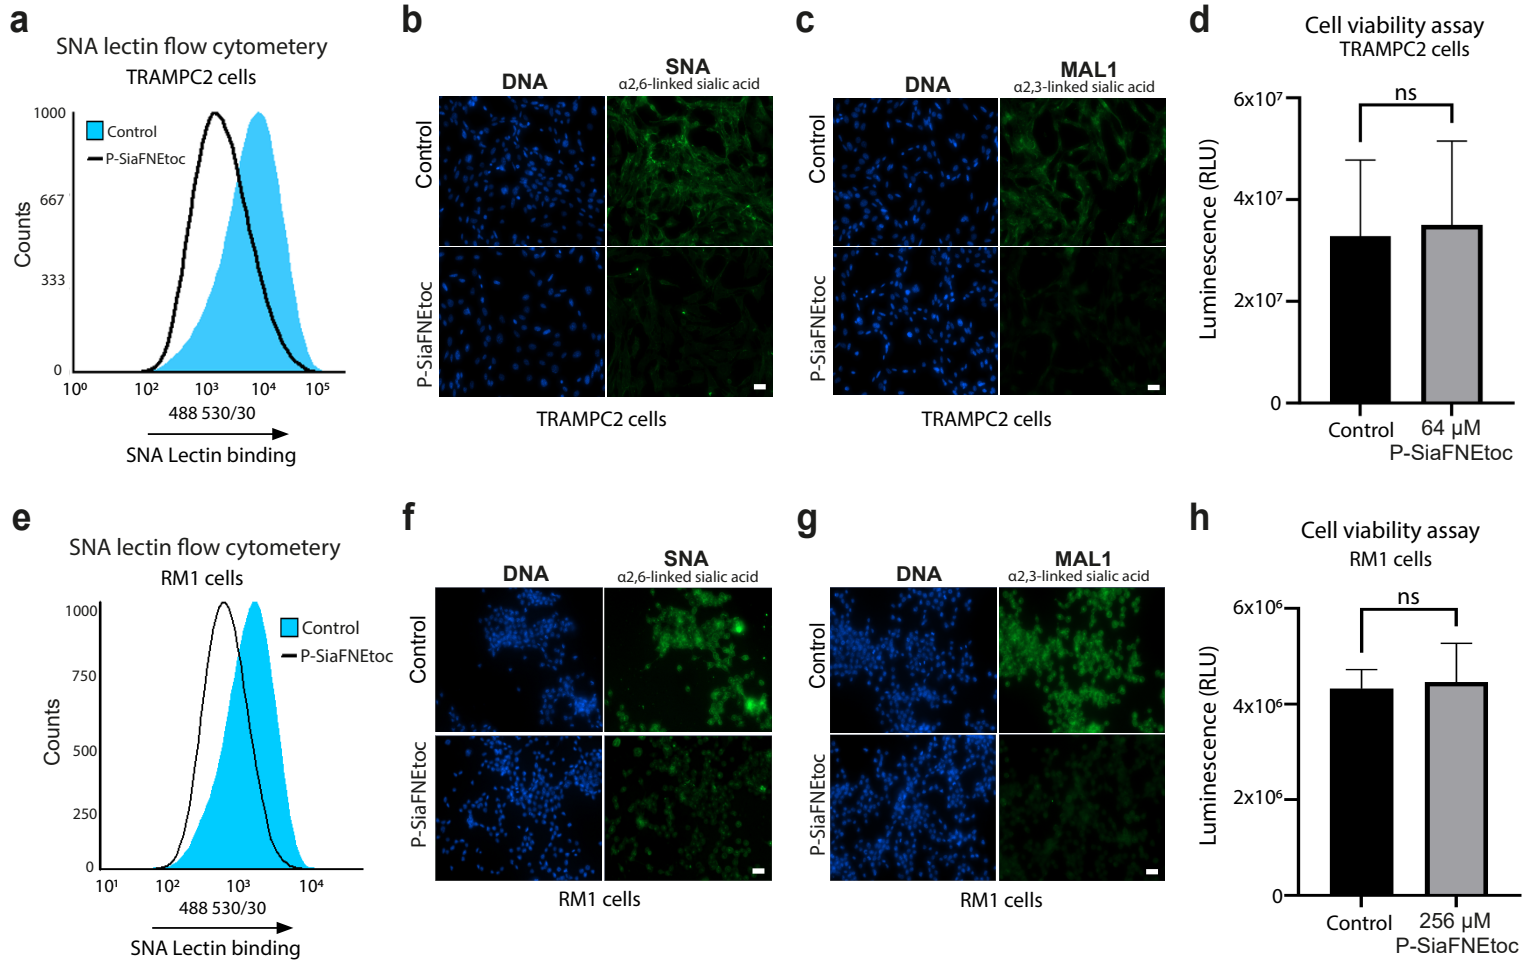

Supplement: mmc1.pdf [file mmc1.pdf]
