# Supplementary material for: Sialic acid blockade inhibits the metastatic spread of prostate cancer to bone
Source: PubMed Central journal article supplement (PMC11134892; doi:10.1016/j.ebiom.2024.105163), 2024-05-20

## Cell Line Authentication Report for Case Number C-30186-1

We have now completed DNA analysis of the samples presented for Cell Line Authentication

**A DNA Profile has been generated from the sample provided by Newcastle University and compared to the relevant profile located on the Cellosaurus Database. A Matching Percentage has been calculated and a value of 97% obtained. Please refer to the detailed results on the second page for further information and interpretation.**

Analysis has been conducted using 17 loci allowing the probability of identity from identical matches an approximate power of discrimination of  $1 \times 10^{14}$  (1 in 100 trillion). Please note that some cell lines may exhibit genetic instability as they proliferate, leading to discrepancies within the DNA profiles examined.

Report Date 22/11/2023

NorthGene™ is a trading name of Biofortuna Limited  
2 Tenth Avenue Deeside Industrial Park Deeside CH5 2UA

This report shall not be reproduced, except in full, without written approval of the laboratory. The validity of these results depends on the quality of the sample provided and the identification of samples being correct.

## Laboratory Report

Test Requested                      Cell Line Authentication  
Case Number                        C-30186-1  
Date Sample Received            13/11/2023  
Date Sample Tested                13/11/2023  
Date Sample Reported            22/11/2023

| Sample Name / Cell Line | Cell Line Source / Profile Source | Sample Number | DNA Number |
|-------------------------|-----------------------------------|---------------|------------|
| CWR22RV1                | Newcastle University              | S-1068834     | D-1068834  |
| 22Rv1 (CVCL_1045)       | Cellosaurus Database              | N/A           | N/A        |

### Table of Allelic Data

| STR Locus | Genotypes              |                                       |                     |
|-----------|------------------------|---------------------------------------|---------------------|
|           | CWR22RV1 (Test Sample) | 22Rv1 (CVCL_1045) (Comparison Sample) | Match vs. Mis-Match |
| D5S818    | 11   13                | 11   12   13                          | Mis-Match           |
| D13S317   | 9   12                 | 9   12                                | Match               |
| D7S820    | 9   10   11            | 9   10   11                           | Match               |
| D16S539   | 12   12                | 12   12                               | Match               |
| vWA       | 15   21                | 15   21                               | Match               |
| TH01      | 6   9.3                | 6   9.3                               | Match               |
| TPOX      | 8   8                  | 8   8                                 | Match               |
| CSF1PO    | 10   11                | 10   11                               | Match               |
| AMEL      | X   Y                  | X   Y                                 | Match               |
| D3S1358   | 15   15                | 15   15                               | Match               |
| D21S11    | 30   30                | 30   30                               | Match               |
| D18S51    | 13   14                | 13   14                               | Match               |
| Penta E   | 5   13                 | 5   13                                | Match               |
| Penta D   | 9   12                 | 9   12                                | Match               |
| D8S1179   | 13   14                | 12   13   14                          | Mis-Match           |
| FGA       | 20   23                | 20   23                               | Match               |
| D19S433   | 13   14                | 13   14                               | Match               |
| D2S1338   | 17   18                | 17   18                               | Match               |

Matching Percentage:  
Outcome:

**97%**  
**Related**

The outcome percentage is calculated using the Tanabe algorithm. The outcome is designated one of the following statements based upon the outcome percentage:

Related (>80% match)  
Inconclusive (60-79% match)  
No Match (59%>)

The Cell Lines are considered to be related.  
Further profiling is required to determine whether the profiles are related.  
It is considered that the two cell lines are unrelated.

Reported By                      Ms. Ish Jones (Laboratory Scientist)



Authorised By                    Ms. Eleanor Ralston (Senior Scientist)



## Cell Line Authentication Report for Case Number C-30186-3

We have now completed DNA analysis of the samples presented for Cell Line Authentication

**A DNA Profile has been generated from the sample provided by Newcastle University and compared to the relevant profile located on the Cellosaurus Database. A Matching Percentage has been calculated and a value of 95% obtained. Please refer to the detailed results on the second page for further information and interpretation.**

Analysis has been conducted using 17 loci allowing the probability of identity from identical matches an approximate power of discrimination of  $1 \times 10^{14}$  (1 in 100 trillion). Please note that some cell lines may exhibit genetic instability as they proliferate, leading to discrepancies within the DNA profiles examined.

Report Date 22/11/2023

NorthGene™ is a trading name of Biofortuna Limited  
2 Tenth Avenue Deeside Industrial Park Deeside CH5 2UA

This report shall not be reproduced, except in full, without written approval of the laboratory. The validity of these results depends on the quality of the sample provided and the identification of samples being correct.

## Laboratory Report

Test Requested                      Cell Line Authentication  
Case Number                        C-30186-3  
Date Sample Received            13/11/2023  
Date Sample Tested                13/11/2023  
Date Sample Reported            22/11/2023

| Sample Name / Cell Line | Cell Line Source / Profile Source | Sample Number | DNA Number |
|-------------------------|-----------------------------------|---------------|------------|
| DU145                   | Newcastle University              | S-1068836     | D-1068836  |
| DU145 (CVCL_0105)       | Cellosaurus Database              | N/A           | N/A        |

### Table of Allelic Data

| STR Locus | Genotypes           |                                       |                     |
|-----------|---------------------|---------------------------------------|---------------------|
|           | DU145 (Test Sample) | DU145 (CVCL_0105) (Comparison Sample) | Match vs. Mis-Match |
| D5S818    | 10   13             | 10   13                               | Match               |
| D13S317   | 12   14             | 12   13   14                          | Mis-Match           |
| D7S820    | 7   10   11         | 7   10   11                           | Match               |
| D16S539   | 11   12   13        | 11   13                               | Mis-Match           |
| vWA       | 17   18             | 17   18   19                          | Mis-Match           |
| TH01      | 7   7               | 7   7                                 | Match               |
| TPOX      | 11   11             | 11   11                               | Match               |
| CSF1PO    | 10   11             | 10   11                               | Match               |
| AMEL      | X   Y               | X   Y                                 | Match               |
| D3S1358   | 16   16             | 16   16                               | Match               |
| D21S11    | 30   33             | 30   33                               | Match               |
| D18S51    | 12   12             | 12   12                               | Match               |
| Penta E   | 12   14             | 12   14                               | Match               |
| Penta D   | 9   13              | 9   13                                | Match               |
| D8S1179   | 13   14             | 13   14                               | Match               |
| FGA       | 22   22             | 22   22                               | Match               |
| D19S433   | 13   13             | 13   13                               | Match               |
| D2S1338   | 16   17             | 16   16                               | Mis-Match           |

Matching Percentage: **94%**  
Outcome: **Related**

The outcome percentage is calculated using the Tanabe algorithm. The outcome is designated one of the following statements based upon the outcome percentage:

|                             |                                                                              |
|-----------------------------|------------------------------------------------------------------------------|
| Related (>80% match)        | The Cell Lines are considered to be related.                                 |
| Inconclusive (60-79% match) | Further profiling is required to determine whether the profiles are related. |
| No Match (59%>)             | It is considered that the two cell lines are unrelated.                      |

Reported By                      Ms. Ish Jones (Laboratory Scientist)



Authorised By                    Ms. Eleanor Ralston (Senior Scientist)



## Cell Line Authentication Report for Case Number C-30186-4

We have now completed DNA analysis of the samples presented for Cell Line Authentication

**A DNA Profile has been generated from the sample provided by Newcastle University and compared to the relevant profile located on the Cellosaurus Database. A Matching Percentage has been calculated and a value of 91% obtained. Please refer to the detailed results on the second page for further information and interpretation.**

Analysis has been conducted using 17 loci allowing the probability of identity from identical matches an approximate power of discrimination of  $1 \times 10^{14}$  (1 in 100 trillion). Please note that some cell lines may exhibit genetic instability as they proliferate, leading to discrepancies within the DNA profiles examined.

Report Date 22/11/2023

NorthGene™ is a trading name of Biofortuna Limited  
2 Tenth Avenue Deeside Industrial Park Deeside CH5 2UA

This report shall not be reproduced, except in full, without written approval of the laboratory. The validity of these results depends on the quality of the sample provided and the identification of samples being correct.

## Laboratory Report

Test Requested                      Cell Line Authentication  
Case Number                        C-30186-4  
Date Sample Received            13/11/2023  
Date Sample Tested                13/11/2023  
Date Sample Reported            22/11/2023

| Sample Name / Cell Line | Cell Line Source / Profile Source | Sample Number | DNA Number |
|-------------------------|-----------------------------------|---------------|------------|
| LNCAP                   | Newcastle University              | S-1068837     | D-1068837  |
| LNCAP (CVCL_0395)       | Cellosaurus Database              | N/A           | N/A        |

## Table of Allelic Data

| STR Locus | Genotypes           |                                       |                     |
|-----------|---------------------|---------------------------------------|---------------------|
|           | LNCAP (Test Sample) | LNCAP (CVCL_0395) (Comparison Sample) | Match vs. Mis-Match |
| D5S818    | 11   12             | 11   12                               | Match               |
| D13S317   | 10   12             | 10   12                               | Match               |
| D7S820    | 9.1   10.3          | 9.1   10.3                            | Match               |
| D16S539   | 11   11             | 11   11                               | Match               |
| vWA       | 16   18             | 16   18                               | Match               |
| TH01      | 9   9               | 9   9                                 | Match               |
| TPOX      | 8   9               | 8   9                                 | Match               |
| CSF1PO    | 10   11             | 10   11                               | Match               |
| AMEL      | X   Y               | X   Y                                 | Match               |
| D3S1358   | 16   16             | 16   16                               | Match               |
| D21S11    | 29   31.2           | 29   31.2   32.2                      | Mis-Match           |
| D18S51    | 11   12             | 11   12                               | Match               |
| Penta E   | 12   15   16        | 12   16                               | Mis-Match           |
| Penta D   | 12   12.4           | 12   12.4                             | Match               |
| D8S1179   | 12   14             | 12   14                               | Match               |
| FGA       | 19   21             | 19   20                               | Mis-Match           |
| D19S433   | 13.2   15           | 14   15                               | Mis-Match           |
| D2S1338   | 16   16             | 16   16                               | Match               |

Matching Percentage:  
Outcome:

**91%**  
**Related**

The outcome percentage is calculated using the Tanabe algorithm. The outcome is designated one of the following statements based upon the outcome percentage:

Related (>80% match)

The Cell Lines are considered to be related.

Inconclusive (60-79% match)

Further profiling is required to determine whether the profiles are related.

No Match (59%>)

It is considered that the two cell lines are unrelated.

Reported By                      Ms. Ish Jones (Laboratory Scientist)



Authorised By                    Ms. Eleanor Ralston (Senior Scientist)



## Cell Line Authentication Report for Case Number C-30186-2

We have now completed DNA analysis of the samples presented for Cell Line Authentication

**A DNA Profile has been generated from the sample provided by Newcastle University and compared to the relevant profile located on the Cellosaurus Database. A Matching Percentage has been calculated and a value of 100% obtained. Please refer to the detailed results on the second page for further information and interpretation.**

Analysis has been conducted using 17 loci allowing the probability of identity from identical matches an approximate power of discrimination of  $1 \times 10^{14}$  (1 in 100 trillion). Please note that some cell lines may exhibit genetic instability as they proliferate, leading to discrepancies within the DNA profiles examined.

Report Date 22/11/2023

NorthGene™ is a trading name of Biofortuna Limited  
2 Tenth Avenue Deeside Industrial Park Deeside CH5 2UA

This report shall not be reproduced, except in full, without written approval of the laboratory. The validity of these results depends on the quality of the sample provided and the identification of samples being correct.

## Laboratory Report

Test Requested                      Cell Line Authentication  
Case Number                        C-30186-2  
Date Sample Received            13/11/2023  
Date Sample Tested                13/11/2023  
Date Sample Reported            22/11/2023

| Sample Name / Cell Line | Cell Line Source / Profile Source | Sample Number | DNA Number |
|-------------------------|-----------------------------------|---------------|------------|
| PC3                     | Newcastle University              | S-1068835     | D-1068835  |
| PC-3 (CVCL_0035)        | Cellosaurus Database              | N/A           | N/A        |

## Table of Allelic Data

| STR Locus | Genotypes         |                                      |                     |
|-----------|-------------------|--------------------------------------|---------------------|
|           | PC3 (Test Sample) | PC-3 (CVCL_0035) (Comparison Sample) | Match vs. Mis-Match |
| D5S818    | 13   13           | 13   13                              | Match               |
| D13S317   | 11   11           | 11   11                              | Match               |
| D7S820    | FAIL              | 8   11                               | Mis-Match           |
| D16S539   | 11   11           | 11   11                              | Match               |
| vWA       | 17   17           | 17   17                              | Match               |
| TH01      | 6   7             | 6   7                                | Match               |
| TPOX      | 8   9             | 8   9                                | Match               |
| CSF1PO    | 11   11           | 11   11                              | Match               |
| AMEL      | X   X             | X   X                                | Match               |
| D3S1358   | 16   16           | 16   16                              | Match               |
| D21S11    | 29   31.2         | 29   31.2                            | Match               |
| D18S51    | 14   15           | 14   15                              | Match               |
| Penta E   | 10   17           | 10   17                              | Match               |
| Penta D   | 9   9             | 9   9                                | Match               |
| D8S1179   | 13   13           | 13   13                              | Match               |
| FGA       | 24   24           | 24   24                              | Match               |
| D19S433   | 14   14           | 14   14                              | Match               |
| D2S1338   | 18   20           | 18   20                              | Match               |

Matching Percentage:  
Outcome:

**100%**  
**Related**

The outcome percentage is calculated using the Tanabe algorithm. The outcome is designated one of the following statements based upon the outcome percentage:

Related (>80% match)

The Cell Lines are considered to be related.

Inconclusive (60-79% match)

Further profiling is required to determine whether the profiles are related.

No Match (59%>)

It is considered that the two cell lines are unrelated.

Reported By                      Ms. Ish Jones (Laboratory Scientist)

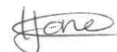

Authorised By                    Ms. Eleanor Ralston (Senior Scientist)



Supplement: mmc4.pdf [file mmc4.pdf]
