# Supplementary material for: Sialic acid blockade inhibits the metastatic spread of prostate cancer to bone
Source: PubMed Central journal article supplement (PMC11134892; doi:10.1016/j.ebiom.2024.105163), 2024-05-20
Supplement: mmc3.pdf [file mmc3.pdf]

**ST6GAL1 Antibody (Center)**  
**Affinity Purified Rabbit Polyclonal Antibody (Pab)**  
**Catalog # AP19891c**

**Specification**

---

**ST6GAL1 Antibody (Center) - Product Information**

|                   |                             |
|-------------------|-----------------------------|
| Application       | WB,E                        |
| Primary Accession | <a href="#">P15907</a>      |
| Other Accession   | <a href="#">NP_775324.1</a> |
| Reactivity        | Human                       |
| Host              | Rabbit                      |
| Clonality         | Polyclonal                  |
| Isotype           | Rabbit IgG                  |
| Calculated MW     | 46605                       |
| Antigen Region    | 178-206                     |

**ST6GAL1 Antibody (Center) - Additional Information**

**Gene ID** 6480

**Other Names**

Beta-galactoside alpha-2, 6-sialyltransferase 1, Alpha 2, 6-ST 1, B-cell antigen CD75, CMP-N-acetylneuraminate-beta-galactosamide-alpha-2, 6-sialyltransferase 1, ST6Gal I, ST6Gall, Sialyltransferase 1, ST6GAL1, SIAT1

**Target/Specificity**

This ST6GAL1 antibody is generated from rabbits immunized with a KLH conjugated synthetic peptide between 178-206 amino acids from the Central region of human ST6GAL1.

**Dilution**

WB~~1:1000

**Format**

Purified polyclonal antibody supplied in PBS with 0.09% (W/V) sodium azide. This antibody is purified through a protein A column, followed by peptide affinity purification.

**Storage**

Maintain refrigerated at 2-8°C for up to 2 weeks. For long term storage store at -20°C in small aliquots to prevent freeze-thaw cycles.

**Precautions**

ST6GAL1 Antibody (Center) is for research use only and not for use in diagnostic or therapeutic procedures.

**ST6GAL1 Antibody (Center) - Protein Information**

**Name** ST6GAL1

## Synonyms SIAT1

**Function** Transfers sialic acid from CMP-sialic acid to galactose- containing acceptor substrates.

## Cellular Location

Golgi apparatus, Golgi stack membrane; Single-pass type II membrane protein. Secreted.

Note=Membrane-bound form in trans cisternae of Golgi. Secreted into the body fluid

## ST6GAL1 Antibody (Center) - Protocols

Provided below are standard protocols that you may find useful for product applications.

- [Western Blot](#)
- [Blocking Peptides](#)
- [Dot Blot](#)
- [Immunohistochemistry](#)
- [Immunofluorescence](#)
- [Immunoprecipitation](#)
- [Flow Cytometry](#)
- [Cell Culture](#)

## ST6GAL1 Antibody (Center) - Images

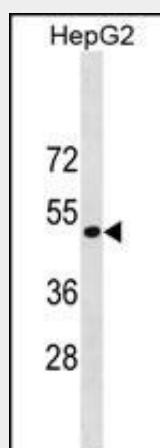

ST6GAL1 Antibody (Center) (Cat. #AP19891c) western blot analysis in HepG2 cell line lysates (35ug/lane). This demonstrates the ST6GAL1 antibody detected the ST6GAL1 protein (arrow).

## ST6GAL1 Antibody (Center) - Background

This gene encodes a member of glycosyltransferase family 29. The encoded protein is a type II membrane protein that catalyzes the transfer of sialic acid from CMP-sialic acid to galactose-containing substrates. The protein, which is normally found in the Golgi but can be proteolytically processed to a soluble form, is involved in the generation of the cell-surface carbohydrate determinants and differentiation antigens HB-6, CD75, and CD76. This gene has been incorrectly referred to as CD75. Three transcript variants encoding two different isoforms have been described.

## ST6GAL1 Antibody (Center) - References

Rose, J.E., et al. Mol. Med. 16 (7-8), 247-253 (2010) :  
Mondal, S., et al. Leuk. Res. 34(4):463-470(2010)  
Lee, M., et al. Oncol. Rep. 23(3):757-761(2010)  
Daly, A.K., et al. Nat. Genet. 41(7):816-819(2009)  
Costa-Nogueira, C., et al. BMC Cancer 9, 431 (2009) :

# Desmoplakin Antibody

Rabbit Polyclonal

Antigen Affinity Purified

Protein ID NP\_004406.2

Catalog No. A303-355A

GeneID 1832

Lot No. A303-355A-1

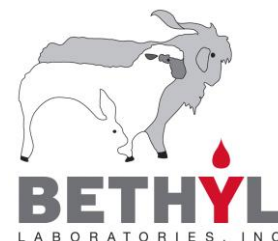

|                              |                                                                                                       |
|------------------------------|-------------------------------------------------------------------------------------------------------|
| <b>APPLICATIONS</b>          | WB, IP                                                                                                |
| <b>SPECIES REACTIVITY</b>    | Human                                                                                                 |
| <b>AMOUNT</b>                | 100 µl                                                                                                |
| <b>CONCENTRATION</b>         | 1000 µg/ml                                                                                            |
| <b>STORAGE/SHELF LIFE</b>    | 2 - 8° C / 1 year from date of receipt                                                                |
| <b>PHYSICAL STATE</b>        | Liquid                                                                                                |
| <b>BUFFER</b>                | Tris-citrate/phosphate buffer, pH 7 to 8 containing 0.09% Sodium Azide                                |
| <b>ISOTYPE</b>               | IgG                                                                                                   |
| <b>ORIGIN</b>                | USA                                                                                                   |
| <b>PRODUCTION PROCEDURES</b> | Antibody was affinity purified using an epitope specific to Desmoplakin immobilized on solid support. |

The epitope recognized by A303-355A maps to a region between residue 1600 and 1650 of human Desmoplakin using the numbering given in entry NP\_004406.2 (GeneID 1832).

Antibody concentration was determined by extinction coefficient: absorbance at 280 nm of 1.4 equals 1.0 mg of IgG.

**APPLICATIONS** Centrifuge tube to remove product from lid. Optimal working dilutions should be determined experimentally by the investigator. Prepare working dilution immediately before use.

Western Blot 1:2,000 - 1:10,000

Immunoprecipitation 2 - 10 µg/mg lysate

**APPLICATION NOTES** Western blot of immunoprecipitates performed using Normal Pig Serum (Cat. No. S100-020), Goat anti-Rabbit Light Chain HRP Conjugate (Cat. No. A120-113P) and 3-8% SDS-PAGE (link to IP-western blot protocol in Additional Info section below).

Western blot of lysates performed using standard western blot reagents and 3-8% SDS-PAGE.

**ADDITIONAL INFO** <https://www.bethyl.com/product/A303-355A>

Use the link above to view SDS, a current list of citations, and other product specific information.

IP-western blot protocol: [https://www.bethyl.com/content/protocol\\_IP\\_WB](https://www.bethyl.com/content/protocol_IP_WB)

This document certifies that this product has met all of the quality control standards defined by Bethyl Laboratories, Inc.  
Eric McIntush, PhD | Chief Scientific Officer Date: June 21, 2019

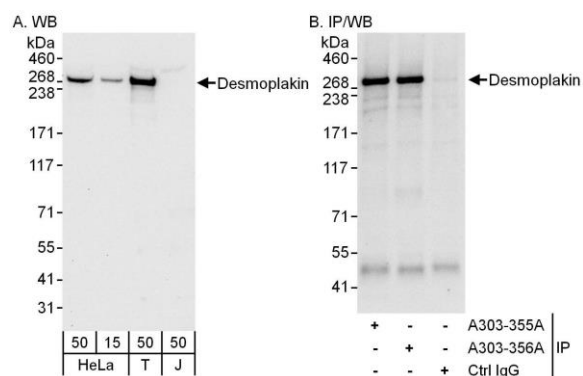

**Detection of human Desmoplakin by western blot and immunoprecipitation.**

*Samples:* Whole cell lysate from HeLa (15 and 50  $\mu$ g for WB; 1 mg for IP, 20% of IP loaded), HEK293T (T; 50  $\mu$ g), and Jurkat (J; 50  $\mu$ g) cells. *Antibodies:* Affinity purified rabbit anti-Desmoplakin antibody A303-355A used for WB at 0.1  $\mu$ g/ml (A) and 1  $\mu$ g/ml (B) and used for IP at 6  $\mu$ g/mg lysate. Desmoplakin was also immunoprecipitated by rabbit anti-Desmoplakin antibody A303-356A, which recognizes a downstream epitope. *Detection:* Chemiluminescence with exposure times of 10 seconds (A and B).

A2066 ▶ **Sigma-Aldrich.**

# Anti-Actin antibody produced in rabbit

**Synonym(s):**

Actin Antibody Sigma, Anti Actin, Anti Actin Antibody Western Blot, Anti Actin Antibody for western blot - Anti-Actin antibody produced in rabbit, Anti Actin Sigma, Sigma Actin Antibody

## PROPERTIES

|                       |                                                                              |
|-----------------------|------------------------------------------------------------------------------|
| biological source     | rabbit                                                                       |
| Quality Level         | <b>200</b>                                                                   |
| conjugate             | unconjugated                                                                 |
| antibody form         | affinity isolated antibody                                                   |
| antibody product type | primary antibodies                                                           |
| clone                 | polyclonal                                                                   |
| form                  | buffered aqueous solution                                                    |
| mol wt                | antigen 42 kDa                                                               |
| species reactivity    | wide range, vertebrates, human, slime mold, amoeba, chicken                  |
| enhanced validation   | independent<br>Learn more about <a href="#">Antibody Enhanced Validation</a> |

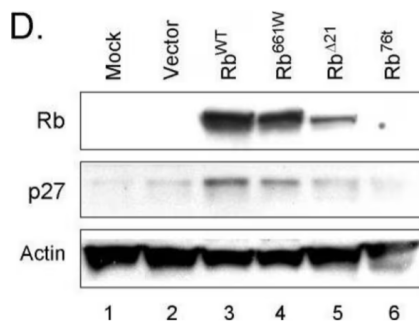

**Western Blotting**

JOURNAL CITATION: *Rb induces a proliferative arrest and curtails Brn-2 expression in retinoblastoma cells.* By: Cobrinik, D., Francis, R. O., et al. in Mol Cancer, 2006. PubMed ID: 17163992  
Image collected and cropped by CiteAb from the following publication, (<http://molecular-cancer.biomedcentral.com/articles/10.1186/1476-4598-5-72>), provided under a CC-BY license. Image might reflect a new usage that is not reflected in claims on product description or independently verified by Merck KGaA, Darmstadt, Germany. For Research Use Only. Not for use in diagnostic procedures.

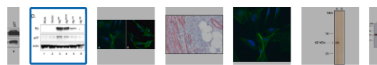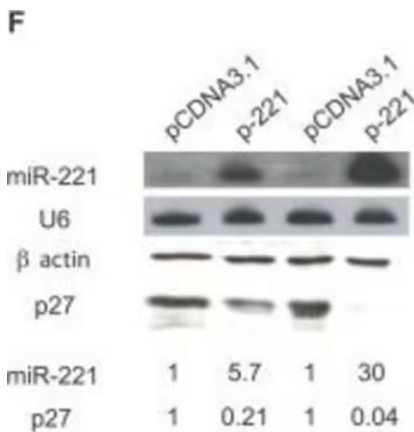

**Western Blotting**

JOURNAL CITATION: *The inhibition of the highly expressed miR-221 and miR-222 impairs the growth of prostate carcinoma xenografts in mice.* By: Mercatelli, N., Coppola, V., et al. in PLoS One, 2008. PubMed ID: 19107213  
Image collected and cropped by CiteAb from the following publication, (<http://dx.plos.org/10.1371/journal.pone.0004029>), provided under a CC-BY license. Image might reflect a new usage that is not reflected in claims on product description or independently verified by Merck KGaA, Darmstadt, Germany. For Research Use Only. Not for use in diagnostic procedures.

**GAPDH Antibody (C-term R248)**  
**Purified Rabbit Polyclonal Antibody (Pab)**  
**Catalog # AP7873b****Specification**

---

**GAPDH Antibody (C-term R248) - Product Information**

|                   |                                                                                                   |
|-------------------|---------------------------------------------------------------------------------------------------|
| Application       | IF, WB, IHC-P, FC,E                                                                               |
| Primary Accession | <a href="#">P04406</a>                                                                            |
| Other Accession   | <a href="#">P04797</a> , <a href="#">P00355</a> , <a href="#">P16858</a> , <a href="#">P00356</a> |
| Reactivity        | Human                                                                                             |
| Predicted         | Chicken, Mouse, Pig, Rat                                                                          |
| Host              | Rabbit                                                                                            |
| Clonality         | Polyclonal                                                                                        |
| Isotype           | Rabbit IgG                                                                                        |
| Calculated MW     | 36053                                                                                             |
| Antigen Region    | 233-259                                                                                           |

**GAPDH Antibody (C-term R248) - Additional Information****Gene ID** 2597**Other Names**

Glyceraldehyde-3-phosphate dehydrogenase, GAPDH, Peptidyl-cysteine S-nitrosylase GAPDH, 2699-, GAPDH, GAPD

**Target/Specificity**

This GAPDH antibody is generated from rabbits immunized with a KLH conjugated synthetic peptide between 233-259 amino acids from the C-terminal region of human GAPDH.

**Dilution**IF~~1:10~50  
WB~~1:1000  
IHC-P~~1:50~100  
FC~~1:10~50**Format**

Purified polyclonal antibody supplied in PBS with 0.09% (W/V) sodium azide. This antibody is prepared by Saturated Ammonium Sulfate (SAS) precipitation followed by dialysis against PBS.

**Storage**

Maintain refrigerated at 2-8°C for up to 2 weeks. For long term storage store at -20°C in small aliquots to prevent freeze-thaw cycles.

**Precautions**

GAPDH Antibody (C-term R248) is for research use only and not for use in diagnostic or therapeutic procedures.

**GAPDH Antibody (C-term R248) - Protein Information**

**Name** GAPDH {ECO:0000303|PubMed:2987855, ECO:0000312|HGNC:HGNC:4141}

**Function** Has both glyceraldehyde-3-phosphate dehydrogenase and nitrosylase activities, thereby playing a role in glycolysis and nuclear functions, respectively (PubMed:[3170585](#), PubMed:[11724794](#)). Glyceraldehyde-3-phosphate dehydrogenase is a key enzyme in glycolysis that catalyzes the first step of the pathway by converting D- glyceraldehyde 3-phosphate (G3P) into 3-phospho-D-glyceroyl phosphate (PubMed:[3170585](#), PubMed:[11724794](#)). Modulates the organization and assembly of the cytoskeleton (By similarity). Facilitates the CHP1- dependent microtubule and membrane associations through its ability to stimulate the binding of CHP1 to microtubules (By similarity). Component of the GAIT (gamma interferon-activated inhibitor of translation) complex which mediates interferon-gamma-induced transcript-selective translation inhibition in inflammation processes (PubMed:[23071094](#)). Upon interferon-gamma treatment assembles into the GAIT complex which binds to stem loop-containing GAIT elements in the 3'-UTR of diverse inflammatory mRNAs (such as ceruplasmin) and suppresses their translation (PubMed:[23071094](#)). Also plays a role in innate immunity by promoting TNF-induced NF-kappa-B activation and type I interferon production, via interaction with TRAF2 and TRAF3, respectively (PubMed:[23332158](#), PubMed:[27387501](#)). Participates in nuclear events including transcription, RNA transport, DNA replication and apoptosis (By similarity). Nuclear functions are probably due to the nitrosylase activity that mediates cysteine S-nitrosylation of nuclear target proteins such as SIRT1, HDAC2 and PRKDC (By similarity).

#### **Cellular Location**

Cytoplasm, cytosol. Nucleus {ECO:0000250|UniProtKB:P04797}. Cytoplasm, perinuclear region. Membrane Cytoplasm, cytoskeleton {ECO:0000250|UniProtKB:P04797} Note=Translocates to the nucleus following S-nitrosylation and interaction with SIAH1, which contains a nuclear localization signal (By similarity). Postnuclear and Perinuclear regions (PubMed:12829261) {ECO:0000250|UniProtKB:P04797, ECO:0000269|PubMed:12829261}

#### **GAPDH Antibody (C-term R248) - Protocols**

Provided below are standard protocols that you may find useful for product applications.

- [Western Blot](#)
- [Blocking Peptides](#)
- [Dot Blot](#)
- [Immunohistochemistry](#)
- [Immunofluorescence](#)
- [Immunoprecipitation](#)
- [Flow Cytometry](#)
- [Cell Culture](#)

#### **GAPDH Antibody (C-term R248) - Images**

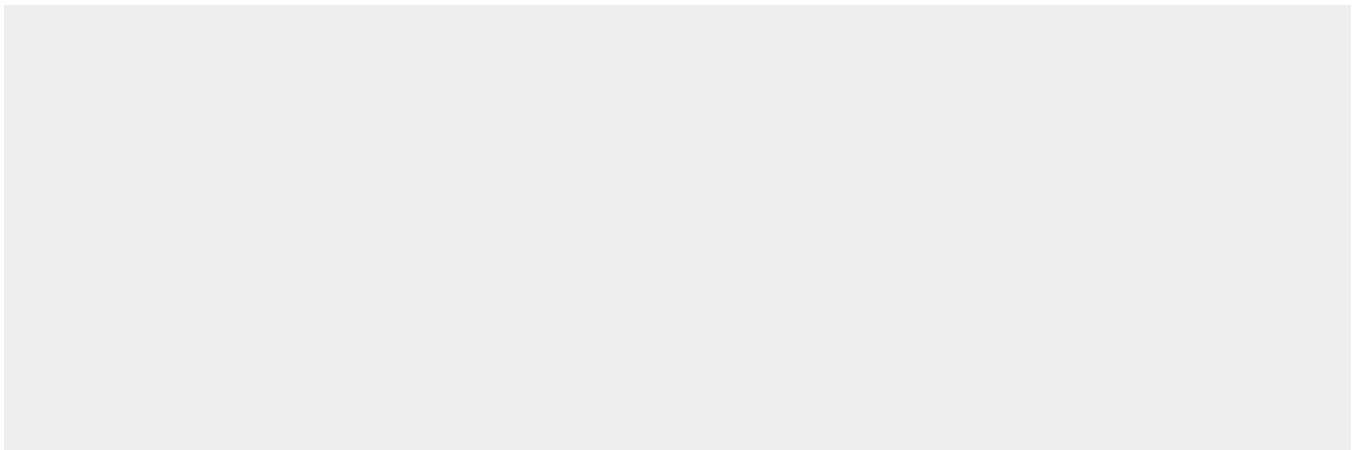



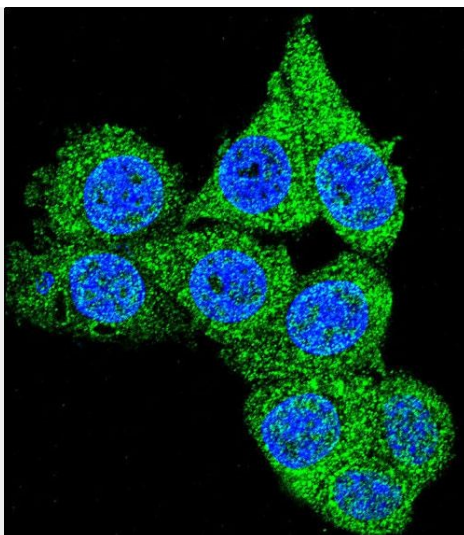

Confocal immunofluorescent analysis of GAPDH Antibody (C-term R248)(Cat#AP7873b) with Hela cell followed by Alexa Fluor 488-conjugated goat anti-rabbit IgG (green). DAPI was used to stain the cell nuclear (blue).

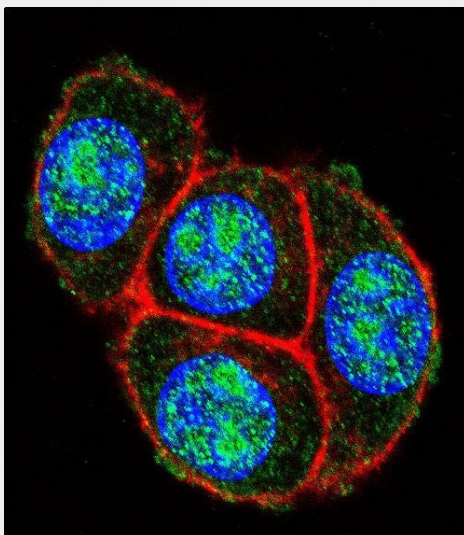

Confocal immunofluorescent analysis of GAPDH Antibody (C-term R248)(Cat#AP7873b) with Hela cell followed by Alexa Fluor 488-conjugated goat anti-rabbit IgG (green). Actin filaments have been labeled with Alexa Fluor 555 phalloidin (red). DAPI was used to stain the cell nuclear (blue).

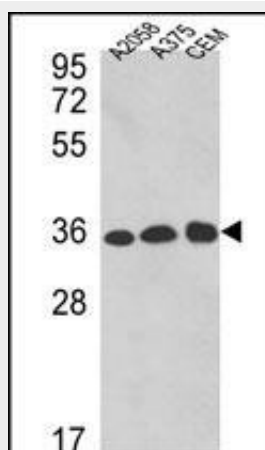

Western blot analysis of GAPDH Antibody (C-term R248) (Cat.#AP7873b) in A2058, A375, CEM cell line lysates (35ug/lane). GAPDH (arrow) was detected using the purified Pab.

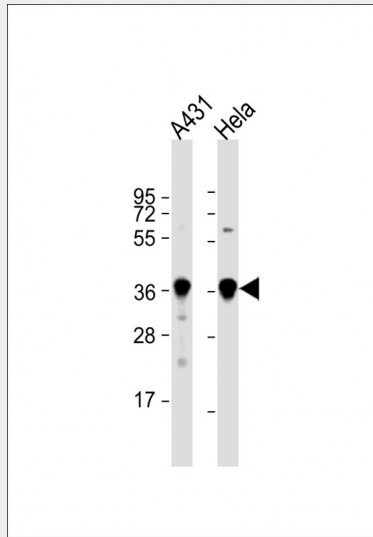

All lanes : Anti-GAPDH Antibody (C-term R248) at 1:1000 dilution Lane 1: A431 whole cell lysate Lane 2: HeLa whole cell lysate Lysates/proteins at 20 µg per lane. Secondary Goat Anti-Rabbit IgG, (H+L), Peroxidase conjugated at 1/10000 dilution. Predicted band size : 36 kDa Blocking/Dilution buffer: 5% NFDM/TBST.

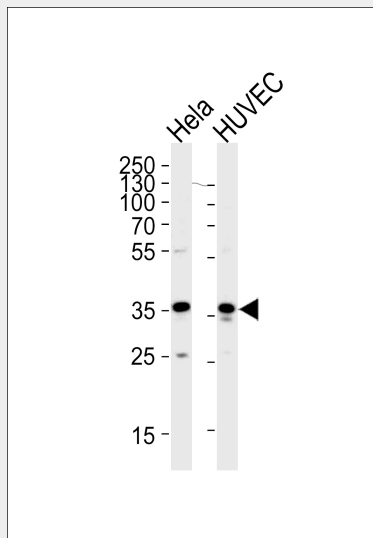

Western blot analysis of lysates from HeLa,HUVEC cell line (from left to right),using GAPDH Antibody (C-term R248)(Cat. #AP7873b).AP7873b was diluted at 1:1000 at each lane. A goat anti-rabbit IgG H&L(HRP) at 1:5000 dilution was used as the secondary antibody.Lysates at 35ug per lane.

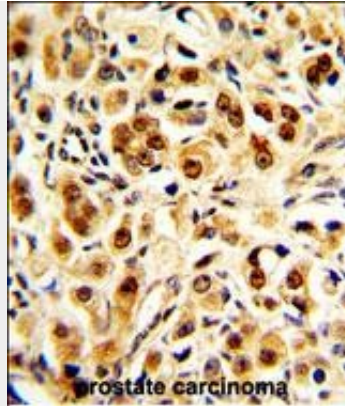

Formalin-fixed and paraffin-embedded human prostate carcinoma with GAPDH Antibody (C-term R248), which was peroxidase-conjugated to the secondary antibody, followed by DAB staining. This data demonstrates the use of this antibody for immunohistochemistry; clinical relevance has not been evaluated.

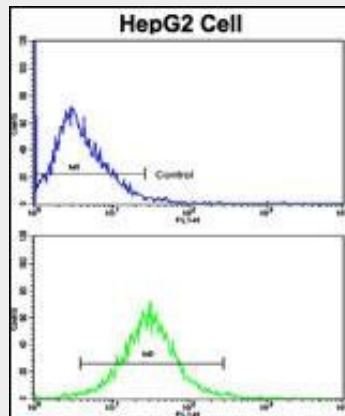

Flow cytometric analysis of HepG2 cells using GAPDH Antibody (C-term R248)(bottom histogram) compared to a negative control cell (top histogram). FITC-conjugated goat-anti-rabbit secondary antibodies were used for the analysis.

### **GAPDH Antibody (C-term R248) - Background**

GAPDH catalyzes an important energy-yielding step in carbohydrate metabolism, the reversible oxidative phosphorylation of glyceraldehyde-3-phosphate in the presence of inorganic phosphate and nicotinamide adenine dinucleotide (NAD). The enzyme exists as a tetramer of identical chains.

### **GAPDH Antibody (C-term R248) - References**

Azam,S., J. Biol. Chem. 283 (45), 30632-30641 (2008)  
Lu,J., Biosci. Biotechnol. Biochem. 72 (9), 2432-2435 (2008)  
Zhou,Y., Mol. Cancer Res. 6 (8), 1375-1384 (2008)

### **GAPDH Antibody (C-term R248) - Citations**

- [An ancient germ cell-specific RNA-binding protein protects the germline from cryptic splice site poisoning.](#)
- [Effects of secreted frizzled-related protein 1 on proliferation, migration, invasion, and apoptosis of colorectal cancer cells.](#)
- [Metalloproteases mepirin-α \(MEP1A\) is a prognostic biomarker and promotes proliferation and invasion of colorectal cancer.](#)
