# Supplementary material for: Sialic acid blockade inhibits the metastatic spread of prostate cancer to bone
Source: PubMed Central journal article supplement (PMC11134892; doi:10.1016/j.ebiom.2024.105163), 2024-05-20

Fig. S2

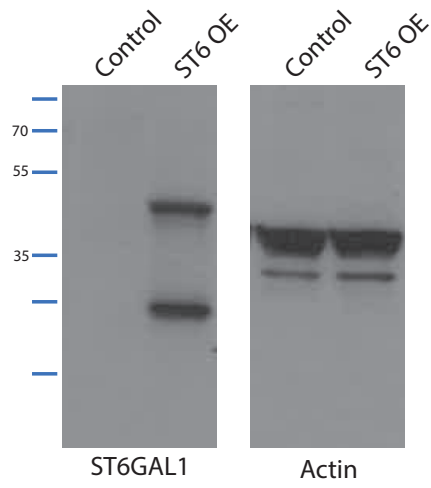

Fig. S6

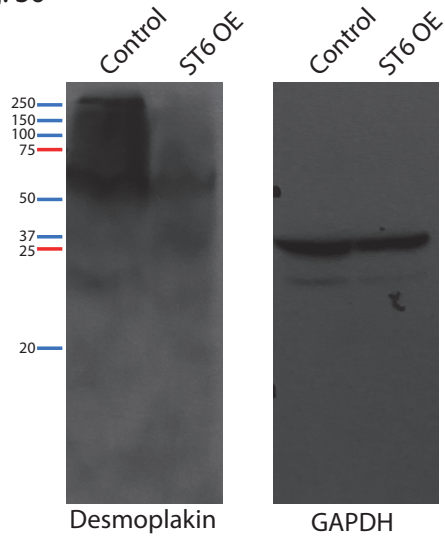

Supplement: mmc5.pdf [file mmc5.pdf]
